# Supplementary material
Source: publisher figshare collection journal article supplement (https://diabetesjournals.figshare.com/articles/dataset/_/21128092)
Supplement: Supplementary file 1 [file 38624168]

eTable 1. Definition of covariates.

eTable 2. Baseline characteristics before and after the Inverse Propensity of Treatment Weighting.

eTable 3. Characteristics of the Inverse Probability of Treatment Weighting cohort.

eTable 4. Incidence rate and risks of heart failure among the three groups without considering the Inverse Probability of Treatment Weighting.

eTable 5 Risks of heart failure at 2 years following atrial fibrillation index date according to pre-diabetes status changes without the Inverse Probability of Treatment Weighting.

eTable 6. BMI and blood pressure distribution in a subgroup of 3712 subjects with available data.

eTable 7. Risk of heart failure in sensitivity analysis that included a subgroup of 3712 subjects with available BMI and blood pressure.

eTable 8. Risks of heart failure in sensitivity analysis by censoring at last clinic visit date.

eFigure 1. Flow chart of the study cohort.

eFigure 2. Changes of glycaemic status among the pre-diabetes group.

Supplementary Appendix

eTable 1. Definition of covariates.

| Entity                       | Definition                                      |
|------------------------------|-------------------------------------------------|
| Atrial Fibrillation          | ICD-9: 427.31                                   |
| Heart Failure                | ICD-9: 402, 404, 425, 428                       |
| Diabetes                     | ICD-9: 250                                      |
| Hypertension                 | ICD-9: 401-405                                  |
| Ischaemic stroke             | ICD-9: 433, 434                                 |
| Transient Ischaemic Attack   | ICD-9: 435                                      |
| Coronary Artery Disease      | ICD-9: 410-414                                  |
| Peripheral Vascular Disease  | ICD-9: 440-444, 447                             |
| Venous Thromboembolism       | ICD-9: 415.1, 451, 453                          |
| Rheumatoid Arthritis         | ICD-9: 714                                      |
| Ankylosing Spondylitis       | ICD-9: 720-724                                  |
| Systemic Sclerosis           | ICD-9: 710.1                                    |
| Systemic Lupus Erythematosus | ICD-9: 710.0                                    |
| Liver Cirrhosis              | ICD-9: 571.2, 571.5, 571.6, 572.2, 572.3, 572.4 |
| Anaemia                      | ICD-9: 280,281-285                              |
| Cancer                       | ICD-9: 140-239                                  |
| Gastrointestinal Bleeding    | ICD-9: 456.0, 531-533, 578                      |
| Dyslipidaemia                | ICD-9: 272, 272.1, 272.2, 272.3, 272.4          |
| Obesity                      | ICD-9: 278                                      |
| Smoking                      | ICD-9: 491, 492, 496                            |

Abbreviation: ICD, International Classification of Diseases.

eTable 2. Baseline characteristics before and after the Inverse Propensity of Treatment Weighting.

|                                                            | Overall             | Normoglycaemia    | Prediabetes          | Diabetes             | Unscreened        | Standardized mean difference before IPTW | Standardized mean difference after IPTW |
|------------------------------------------------------------|---------------------|-------------------|----------------------|----------------------|-------------------|------------------------------------------|-----------------------------------------|
|                                                            | N=25,142            | N=3,711 (14.8%)   | N=4,105 (16.3%)      | N=10,127 (40.3%)     | N= 7,199 (28.6%)  |                                          |                                         |
| Age, mean (SD)                                             | 75.2 (12.2)         | 75.0 (12.5)       | 75.1 (11.0)          | 75.8 (10.9)          | 74.5 (14.1)       | 0.065                                    | 0.018                                   |
| Female, No. (%)                                            | 11,848 (47.1)       | 1,784 (48.1)      | 1,843 (44.9)         | 4,806 (47.5)         | 3415 (47.4)       | 0.037                                    | 0.009                                   |
| Smoking, No. (%)                                           | 1,935 (7.7)         | 280 (7.5)         | 296 (7.2)            | 764 (7.5)            | 595 (8.3)         | 0.020                                    | 0.008                                   |
| CHA <sub>2</sub> DS <sub>2</sub> -VASc score, median (IQR) | 4.0 (2.0-5.0)       | 3.0 (2.0-4.0)     | 3.0 (2.0-4.0)        | 5.0 (4.0-6.0)        | 3.0 (2.0-4.0)     | 0.670                                    | 0.071                                   |
| High-risk (≥2), No. (%)                                    | 19,809 (78.7)       | 2,677 (72.1)      | 3,010 (73.3)         | 9,310 (91.9)         | 4,812 (66.8)      |                                          |                                         |
| Intermediate-risk (=1), No. (%)                            | 3,584 (14.3)        | 660 (17.8)        | 725 (17.7)           | 817 (8.1)            | 1,382 (19.2)      |                                          |                                         |
| Low-risk (=0), No. (%)                                     | 1,749 (7.0)         | 374 (10.1)        | 370 (9.0)            | 0 (0)                | 1,005 (14.0)      |                                          |                                         |
| Fasting blood glucose, mg/dl, median (IQR)                 | 115.3 (95.5, 147.6) | 91.0 (86.5, 95.5) | 106.3 (102.7, 111.7) | 149.6 (135.2, 175.5) | -                 | 0.326                                    | 0.013                                   |
| HbA1c, %, median (IQR)                                     | 6.9 (6.1, 7.7)      | 5.4 (5.2, 5.5)    | 6.0 (5.8, 6.1)       | 7.3 (6.9, 8.1)       | -                 | 0.279                                    | 0.006                                   |
| eGFR, ml/min/1.73 m <sup>2</sup> , median (IQR)            | 65.4 (48.7, 80.8)   | 71.7 (58.5, 85.7) | 69.6 (57.0, 82.9)    | 64.6 (47.5, 81.1)    | 65.7 (48.2, 81.2) | 0.129                                    | 0.008                                   |

|                                                                  |               |              |              |              |              |       |       |
|------------------------------------------------------------------|---------------|--------------|--------------|--------------|--------------|-------|-------|
| Subjects with eGFR below 60 ml/min/1.73 m <sup>2</sup> , No. (%) | 8,329 (33.1)  | 959 (25.8)   | 1,184 (28.8) | 4,184 (41.3) | 2,002 (27.8) | 0.211 | 0.014 |
| Medical conditions, No. (%)                                      |               |              |              |              |              |       |       |
| Hypertension                                                     | 7,685 (30.6)  | 978 (26.4)   | 1,252 (30.5) | 3,971 (39.2) | 1,484 (20.6) | 0.243 | 0.012 |
| Ischaemic stroke                                                 | 2,898 (11.5)  | 399 (10.8)   | 521 (12.7)   | 1,418 (14.0) | 560 (7.8)    | 0.110 | 0.006 |
| TIA                                                              | 604 (2.4)     | 93 (2.5)     | 140 (3.4)    | 275 (2.7)    | 96 (1.3)     | 0.071 | 0.002 |
| CAD                                                              | 3,281 (13.0)  | 377 (10.2)   | 735 (17.9)   | 1,667 (16.5) | 502 (7.0)    | 0.198 | 0.007 |
| PVD                                                              | 933 (3.7)     | 136 (3.7)    | 158 (3.8)    | 479 (4.7)    | 160 (2.2)    | 0.071 | 0.003 |
| VTE                                                              | 241 (1.0)     | 34 (0.9)     | 20 (0.5)     | 121 (1.2)    | 66 (0.9)     | 0.052 | 0.004 |
| Autoimmune diseases*                                             | 3,793 (15.1)  | 600 (16.2)   | 595 (14.5)   | 1,533 (15.1) | 1065 (14.8)  | 0.015 | 0.013 |
| Liver cirrhosis                                                  | 145 (0.6)     | 21 (0.6)     | 16 (0.4)     | 75 (0.7)     | 33 (0.5)     | 0.031 | 0.002 |
| Anaemia                                                          | 2,390 (9.5)   | 309 (8.3)    | 280 (6.8)    | 1,246 (12.3) | 555 (7.7)    | 0.125 | 0.023 |
| Cancer                                                           | 4,039 (16.1)  | 596 (16.1)   | 635 (15.5)   | 1,754 (17.3) | 1,054 (14.6) | 0.040 | 0.004 |
| GIB                                                              | 2,737 (10.9)  | 380 (10.2)   | 422 (10.3)   | 1,217 (12.0) | 718 (10.0)   | 0.042 | 0.005 |
| Dyslipidaemia                                                    | 2,427 (9.7)   | 246 (6.6)    | 448 (10.9)   | 1,431 (14.1) | 302 (4.2)    | 0.210 | 0.007 |
| Obesity                                                          | 258 (1.0)     | 12 (0.3)     | 25 (0.6)     | 204 (2.0)    | 17 (0.2)     | 0.114 | 0.009 |
| Medication use, No. (%)                                          |               |              |              |              |              |       |       |
| NOAC                                                             | 13,196 (52.5) | 2,006 (54.1) | 2,562 (62.4) | 5,401 (53.3) | 3,227 (44.8) | 0.195 | 0.006 |
| Warfarin                                                         | 4,333 (17.2)  | 586 (15.8)   | 753 (18.3)   | 2,014 (19.9) | 980 (13.6)   | 0.098 | 0.002 |
| Statins                                                          | 10,024 (39.9) | 1,245 (33.5) | 1,851 (45.1) | 5,562 (54.9) | 1,366 (19.0) | 0.441 | 0.078 |
| Aspirin                                                          | 9,830 (39.1)  | 1,378 (37.1) | 1,935 (47.1) | 4,657 (46.0) | 1,860 (25.8) | 0.243 | 0.042 |
| Beta Blockers                                                    | 8,032 (31.9)  | 1,202 (32.4) | 1,447 (35.2) | 3,603 (35.6) | 1,780 (24.7) | 0.119 | 0.010 |
| ACEI/ARB                                                         | 12,004 (47.7) | 1,457 (39.3) | 1,836 (44.7) | 6,748 (66.6) | 1,963 (27.3) | 0.495 | 0.034 |

| Procedure, No. (%) |           |          |          |          |          |       |       |
|--------------------|-----------|----------|----------|----------|----------|-------|-------|
| Ablation           | 144 (0.6) | 22 (0.6) | 25 (0.6) | 27 (0.3) | 70 (1.0) | 0.052 | 0.002 |
| Cardioversion      | 78 (0.3)  | 8 (0.2)  | 10 (0.2) | 32 (0.3) | 28 (0.4) | 0.011 | 0.001 |

Abbreviation: N, number; IPTW, inverse probability of treatment weighting; SD, standard deviation; IQR, interquartile range; HF, heart failure; HbA1c, haemoglobin A1c; eGFR, estimated glomerular filtration rate; TIA, transient ischaemic attack; CAD, coronary artery disease; PVD, peripheral vascular disease; VTE, venous thromboembolism; GIB, gastrointestinal bleeding; NOAC, non-vitamin K antagonist oral anticoagulant; ACEI/ARB, angiotensin-converting enzyme/ angiotensin II receptor blocker.

\*Autoimmune diseases include rheumatoid arthritis, systemic sclerosis, systemic lupus erythematosus, and ankylosing spondylitis.

The standardized mean difference is calculated across normoglycaemia, pre-diabetes and diabetes groups.

A variable is considered balanced between users and nonusers where the standardized mean difference is  $\leq 0.1$ .

eTable 3. Characteristics of the Inverse Probability of Treatment Weighting cohort.

|                                                               | Normoglycaemia<br>N=2,057 | Prediabetes<br>N=2,851 | Diabetes<br>N=7,448 |
|---------------------------------------------------------------|---------------------------|------------------------|---------------------|
| Age, mean (SD), y                                             | 74.5 (9.0)                | 75.1 (11.0)            | 75.0 (11.3)         |
| Female, No. (%)                                               | 1,025 (49.8)              | 1,272 (44.6)           | 3,494 (46.9)        |
| Smoking, No. (%)                                              | 184 (8.9)                 | 195 (6.8)              | 559 (7.5)           |
| CHA <sub>2</sub> DS <sub>2</sub> -VASc score,<br>median (IQR) | 3.0 (2.0-4.0)             | 3.0 (2.0-4.0)          | 4.0 (2.0-5.0)       |
| Medical conditions, No. (%)                                   |                           |                        |                     |
| Hypertension                                                  | 623 (30.3)                | 879 (30.8)             | 2,860 (38.4)        |
| Ischaemic stroke                                              | 250 (12.2)                | 351 (12.3)             | 1,018 (13.7)        |
| TIA                                                           | 57 ( 2.8)                 | 99 ( 3.5)              | 201 ( 2.7)          |
| CAD                                                           | 225 (10.9)                | 522 (18.3)             | 1,220 (16.4)        |
| PVD                                                           | 83 ( 4.0)                 | 110 ( 3.9)             | 332 ( 4.5)          |
| VTE                                                           | 21 ( 1.0)                 | 14 ( 0.5)              | 93 ( 1.2)           |
| Autoimmune diseases*                                          | 340 (16.5)                | 372 (13.0)             | 1,080 (14.5)        |
| Liver cirrhosis                                               | 11 ( 0.5)                 | 10 ( 0.4)              | 57 ( 0.8)           |
| Anaemia                                                       | 210 (10.2)                | 192 ( 6.7)             | 898 (12.1)          |
| Cancer                                                        | 360 (17.5)                | 431 (15.1)             | 1,270 (17.1)        |
| GIB                                                           | 235 (11.4)                | 289 (10.1)             | 883 (11.9)          |
| Dyslipidaemia                                                 | 143 ( 7.0)                | 314 (11.0)             | 1,020 (13.7)        |
| Obesity                                                       | 7 ( 0.3)                  | 18 ( 0.6)              | 154 ( 2.1)          |
| Medication use, No. (%)                                       |                           |                        |                     |
| NOAC                                                          | 1,125 (54.7)              | 1,753 (61.5)           | 4,052 (54.4)        |
| Warfarin                                                      | 324 (15.8)                | 526 (18.4)             | 1,487 (20.0)        |
| Statins                                                       | 727 (35.3)                | 1,276 (44.8)           | 4,066 (54.6)        |
| Aspirin                                                       | 808 (39.3)                | 1,335 (46.8)           | 3,349 (45.0)        |
| Beta Blockers                                                 | 698 (33.9)                | 994 (34.9)             | 2,623 (35.2)        |
| ACEI/ARB                                                      | 861 (41.9)                | 1,278 (44.8)           | 4,883 (65.6)        |
| Procedure, No. (%)                                            |                           |                        |                     |
| Ablation                                                      | 9 (0.4)                   | 10 (0.4)               | 20 (0.3)            |
| Cardioversion                                                 | 4 (0.2)                   | 6 (0.2)                | 15 (0.2)            |

Abbreviation: N, number; SD, standard deviation; IQR, interquartile range; HF, heart failure; TIA, transient ischemia attack; CAD, coronary artery disease; PVD, peripheral vascular disease; VTE, venous thromboembolism; GIB, gastrointestinal bleeding; NOAC, non-vitamin K antagonist oral anticoagulant; ACEI/ARB, angiotensin-converting enzyme/ angiotensin II receptor blocker.

\*Autoimmune diseases include rheumatoid arthritis, systemic sclerosis, systemic lupus

erythematous, and ankylosing spondylitis.

eTable 4. Incidence rate and risks of heart failure among the three groups without considering the Inverse Probability of Treatment Weighting.

| N= 17,943      | Event number/Total No.(%) | Incidence rate | Unadjusted SHR (95%CI) P-value | Model 1 SHR (95%CI) P-value | Model 2 SHR (95%CI) P-value |
|----------------|---------------------------|----------------|--------------------------------|-----------------------------|-----------------------------|
| Normoglycaemia | 518/3,711 (14.0)          | 3.02           | Ref                            | Ref                         | Ref                         |
| Pre-diabetes   | 646/4,105 (15.7)          | 3.14           | 1.10 (0.98-1.24) 0.09          | 1.13 (1.01-1.27) <0.01      | 1.06 (1.02-1.12) 0.03       |
| Diabetes       | 1,795/10,127 (17.7)       | 3.38           | 1.26 (1.15-1.39) <0.01         | 1.25 (1.13-1.37) <0.01      | 1.23 (1.12-1.37) <0.01      |

Abbreviation: N, number; SHR, subdistribution hazard ratio; CI, confidence interval; Ref, reference.

Model 1 adjusted for age and sex.

Model 2 adjusted for age, sex, CHA<sub>2</sub>DS<sub>2</sub>-VASc score, hypertension, stroke, transient ischaemic attack, coronary artery disease, estimated glomerular filtration rate, peripheral vascular disease, rheumatoid arthritis, gastrointestinal bleeding, autoimmune diseases, anaemia, cancer, non-vitamin K antagonist oral anticoagulant, angiotensin-converting enzyme/ angiotensin II receptor blocker, Beta-blockers, statins, aspirin, warfarin, smoking, obesity, and dyslipidaemia.



eTable 5. Risks of heart failure at 2 years following atrial fibrillation index date according to pre-diabetes status changes without Inverse Probability of Treatment Weighting.

| N=3,620                     | Incidence rate | Unadjusted             | Model 1                | Model 2               |
|-----------------------------|----------------|------------------------|------------------------|-----------------------|
|                             |                | SHR (95% CI) P-value   | SHR (95% CI) P-value   | SHR (95% CI) P-value  |
| Reversion to normoglycaemia | 0.94           | 0.79 (0.61-0.97) 0.01  | 0.72 (0.47-0.94) <0.01 | 0.63 (0.41-0.97) 0.03 |
| Persistent pre-diabetes     | 1.29           | Ref                    | Ref                    | Ref                   |
| Progression to diabetes     | 1.78           | 1.47 (1.18-1.74) <0.01 | 1.41 (1.15-1.70) <0.01 | 1.49 (1.11-1.99) 0.01 |

Abbreviation: N, number; SHR, subdistribution hazard ratio; CI, confidence interval; Ref, reference.

Model 1 adjusted for age and sex.

Model 2 adjusted for age, sex, CHA<sub>2</sub>DS<sub>2</sub>-VASc score, hypertension, stroke, transient ischaemic attack, coronary artery disease, estimated glomerular filtration rate, peripheral vascular disease, rheumatoid arthritis, gastrointestinal bleeding, autoimmune diseases, anaemia, cancer, non-vitamin K antagonist oral anticoagulant, angiotensin-converting enzyme/ angiotensin II receptor blocker, Beta-blockers, statins, aspirin, warfarin, smoking, obesity, and dyslipidaemia.

eTable 6. BMI and blood pressure distribution in a subgroup of 3712 subjects with available data.

| N= 3,712                                  | Normoglycaemia    | Pre-diabetes      | Diabetes          |
|-------------------------------------------|-------------------|-------------------|-------------------|
| Event number/Total No.(%)                 | 113/740 (15.3)    | 163/822 (19.8)    | 374/2,150(17.4)   |
| BMI, kg/m <sup>2</sup> , median (IQR)     | 22.3 (18.2, 26.2) | 23.5 (18.7, 28.3) | 23.8 (19.3, 28.3) |
| Systolic blood pressure, mmHg, mean (SD)  | 141.5 (23.2)      | 143.2 (23.5)      | 144.5 (23.8)      |
| Diastolic blood pressure, mmHg, mean (SD) | 78.5 (14.8)       | 79.6 (15.2)       | 77.3 (15.0)       |

Abbreviation: BMI, body mass index; N, number; IQR, interquartile range; SD, standard deviation; SHR, subdistribution hazard ratio; CI, confidence interval; Ref, reference.

eTable 7. Risk of heart failure in sensitivity analysis that included a subgroup of 3712 subjects with available BMI and blood pressure.

| N= 3,712                           | Normoglycaemia | Pre-diabetes | Diabetes    |
|------------------------------------|----------------|--------------|-------------|
| Unadjusted                         |                | 1.30         | 1.13        |
| SHR (95% CI) P                     | Ref            | (1.03-1.65)  | (1.01-1.29) |
|                                    |                | 0.03         | 0.03        |
| Model 1                            |                | 1.34         | 1.14        |
| SHR (95% CI) P                     | Ref            | (1.16-1.59)  | (1.02-1.30) |
|                                    |                | 0.02         | 0.02        |
| Model 2                            |                | 1.25         | 1.21        |
| SHR (95% CI) P                     | Ref            | (1.03-1.50)  | (1.12-1.30) |
|                                    |                | 0.02         | 0.02        |
| Model 2+ <b>BMI</b>                |                | 1.20         | 1.16        |
| SHR (95% CI) P                     | Ref            | (1.04-1.35)  | (1.09-1.24) |
|                                    |                | 0.01         | 0.03        |
| Model 2+ <b>BMI+blood pressure</b> |                | 1.20         | 1.17        |
| SHR (95% CI) P                     | Ref            | (1.05-1.38)  | (1.08-1.30) |
|                                    |                | 0.01         | 0.03        |

Abbreviation: BMI, body mass index; N, number; SHR, subdistribution hazard ratio; CI, confidence interval; Ref, reference.

Model 1 adjusted for age and sex.

Model 2 adjusted for age, sex, CHA<sub>2</sub>DS<sub>2</sub>-VASc score, hypertension, stroke, transient ischaemic attack, coronary artery disease, estimated glomerular filtration rate, peripheral vascular disease, rheumatoid arthritis, gastrointestinal bleeding, autoimmune diseases, anaemia, cancer, non-vitamin K antagonist oral anticoagulant, angiotensin-converting enzyme/ angiotensin II receptor blocker, Beta-blockers, statins, aspirin, warfarin, smoking, obesity, and dyslipidaemia.

eTable 8. Risks of heart failure in sensitivity analysis by censoring at last clinic visit date.

| *N= 17,621     | Event<br>number/Total<br>No.(%) | Unadjusted<br>SHR<br>(95% CI)<br>P-value | Model 1<br>SHR<br>(95% CI)<br>P-value | Model 2<br>SHR<br>(95% CI)<br>P-value |
|----------------|---------------------------------|------------------------------------------|---------------------------------------|---------------------------------------|
| Normoglycaemia | 518/3638<br>(14.2)              | Ref                                      | Ref                                   | Ref                                   |
| Pre-diabetes   | 646/4019<br>(16.1)              | 1.10<br>(0.98-1.24)<br>0.09              | 1.14<br>(1.02-1.28)<br>0.03           | 1.11<br>(1.03-1.20)<br>0.01           |
| Diabetes       | 1795/9964<br>(18.0)             | 1.20<br>(1.07-1.33)<br><0.01             | 1.20<br>(1.09-1.32)<br><0.01          | 1.21<br>(1.11-1.30)<br><0.01          |

Abbreviation: N, number; SHR, subdistribution hazard ratio; CI, confidence interval; Ref, reference.

Model 1 adjusted for age and sex.

Model 2 adjusted for age, sex, CHA2DS2-VASc score, hypertension, stroke, transient ischaemic attack, coronary artery disease, estimated glomerular filtration rate, peripheral vascular disease, rheumatoid arthritis, gastrointestinal bleeding, autoimmune diseases, anaemia, cancer, non-vitamin K antagonist oral anticoagulant, angiotensin-converting enzyme/ angiotensin II receptor blocker, Beta-blockers, statins, aspirin, warfarin, smoking, obesity, and dyslipidaemia.

\*Among 17,943 patients in the entire study cohort, 322 (1.8%) patients without clinic visits after the index date.

**eFigure 1. Flow chart of the study cohort.**

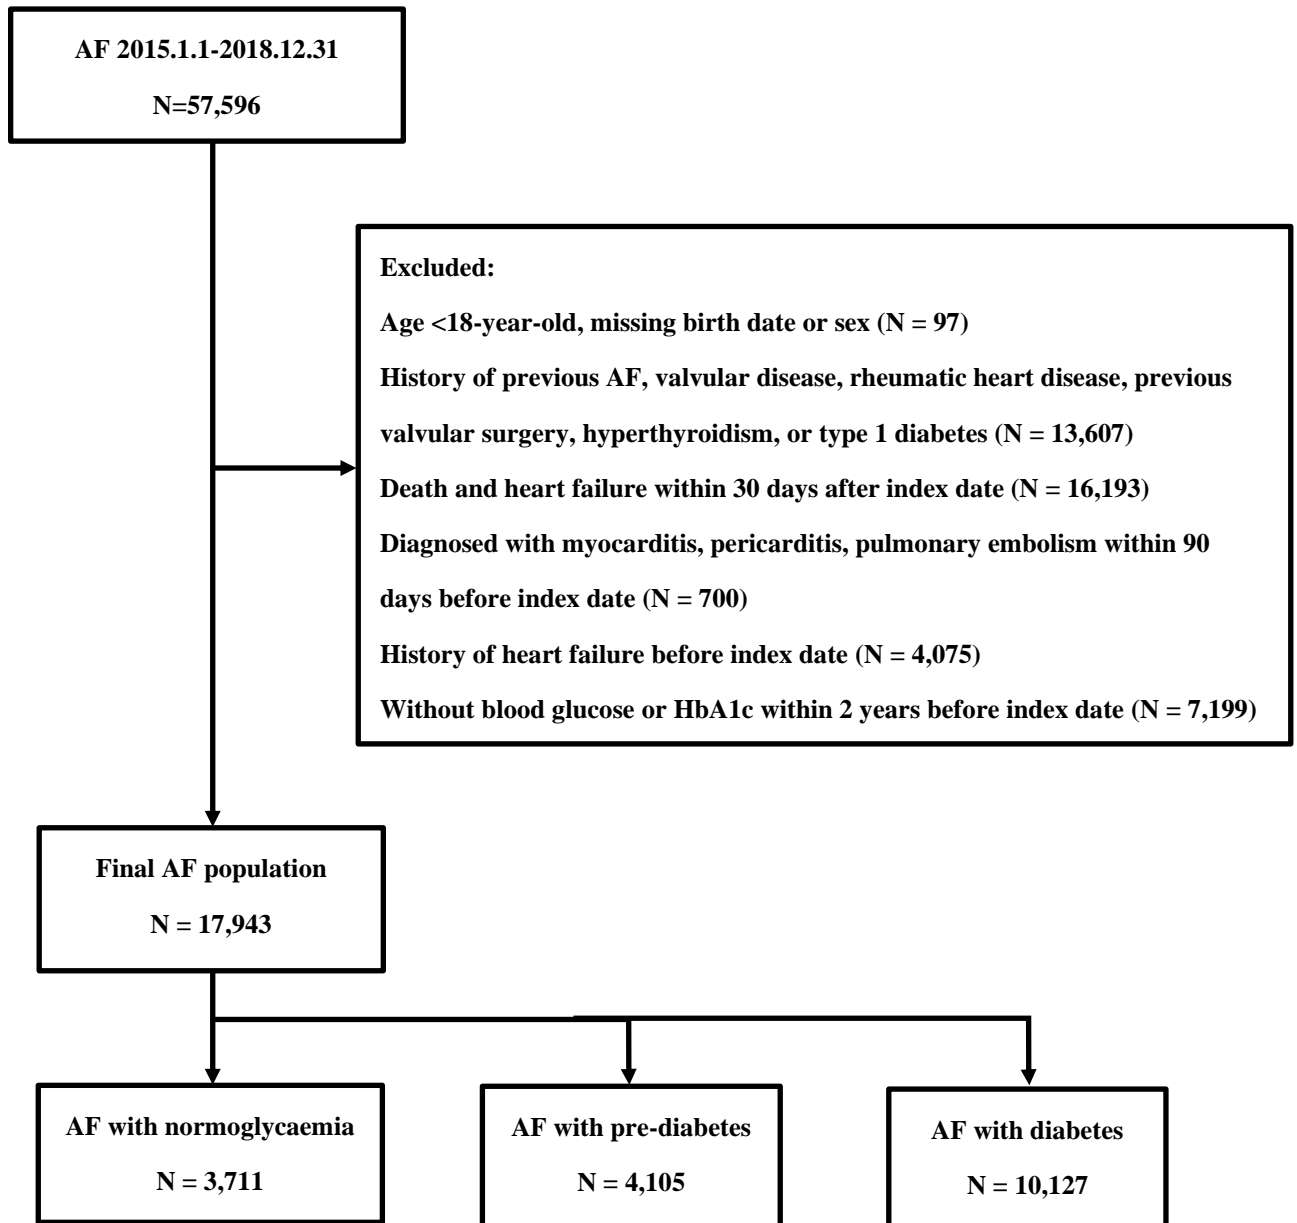

Abbreviation: AF, atrial fibrillation; N, number; HbA1c, haemoglobin A1c.

eFigure 2. Changes of glycaemic status among the pre-diabetes group.

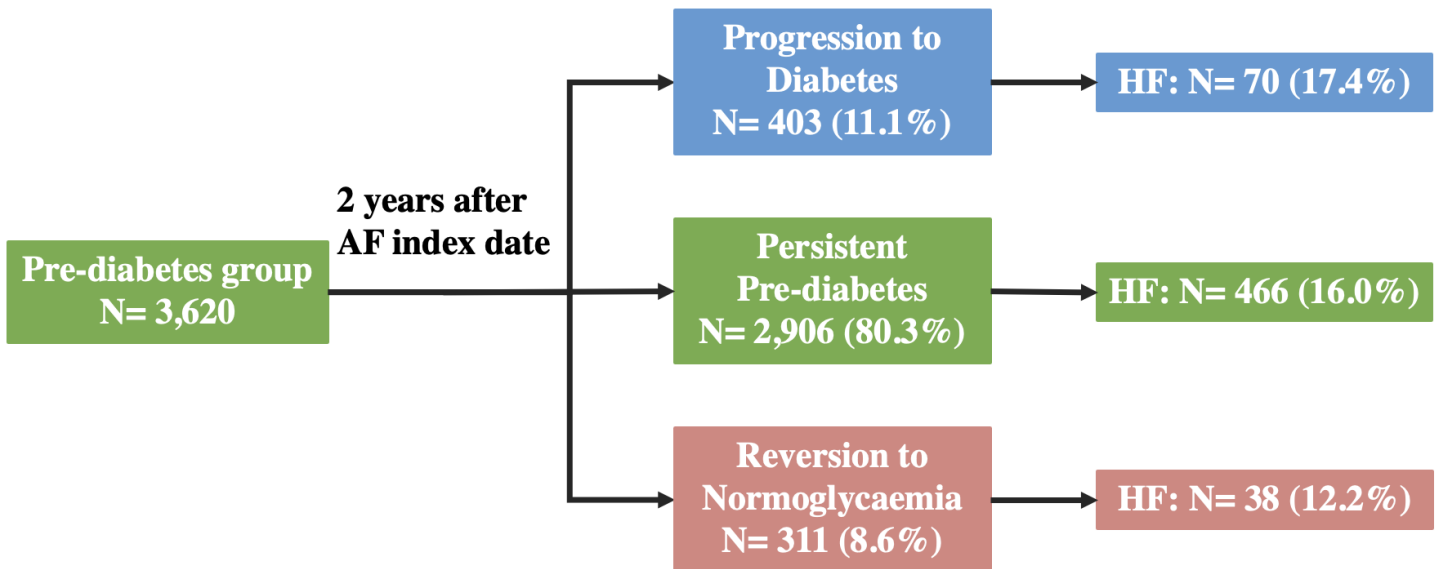

Abbreviation: N, number; AF, atrial fibrillation; HF, heart failure.
